# Supplementary material for: Facile one-pot synthesis of defect-engineered step-scheme WO3/g-C3N4 heterojunctions for efficient photocatalytic hydrogen production
Source: Royal Society of Chemistry journal article supplement (doi:10.1039/d0cy02478c), 2021-01-01
Supplement: d0cy02478c1.pdf [file d0cy02478c1.pdf]

## Supporting information

# Facile one-pot synthesis of defect-engineered step-scheme $\text{WO}_3/\text{g-C}_3\text{N}_4$ heterojunctions for efficient photocatalytic hydrogen production

Xiya Du<sup>#, a</sup>, Song Song<sup>#, a</sup>, Yating Wang<sup>\*, c</sup>, Wenfeng Jin<sup>a</sup>, Tong Ding<sup>a</sup>, Ye Tian<sup>a</sup> and Xingang Li<sup>\*, a, b</sup>

<sup>a</sup> Collaborative Innovation Center of Chemical Science and Engineering (Tianjin), State Key Laboratory of Chemical Engineering, Tianjin Key Laboratory of Applied Catalysis Science and Engineering, School of Chemical Engineering and Technology, Tianjin University, Tianjin 300072, P. R. China.

<sup>b</sup> School of Chemical and Biological Engineering, Lanzhou Jiaotong University, Lanzhou, 730070, P. R. China.

<sup>c</sup> Tianjin Key Laboratory of Brine Chemical Engineering and Resource Eco-utilization, School of Chemical Engineering and Material Science, Tianjin University of Science & Technology, Tianjin 300457, P. R. China.

\*Corresponding author

Email: xingang\_li@tju.edu.cn

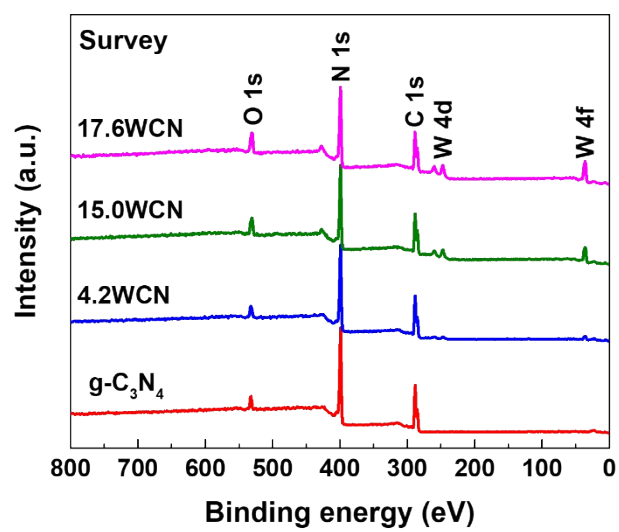

**Fig. S1.** XPS survey spectra of g-C<sub>3</sub>N<sub>4</sub> and *n*WCN.

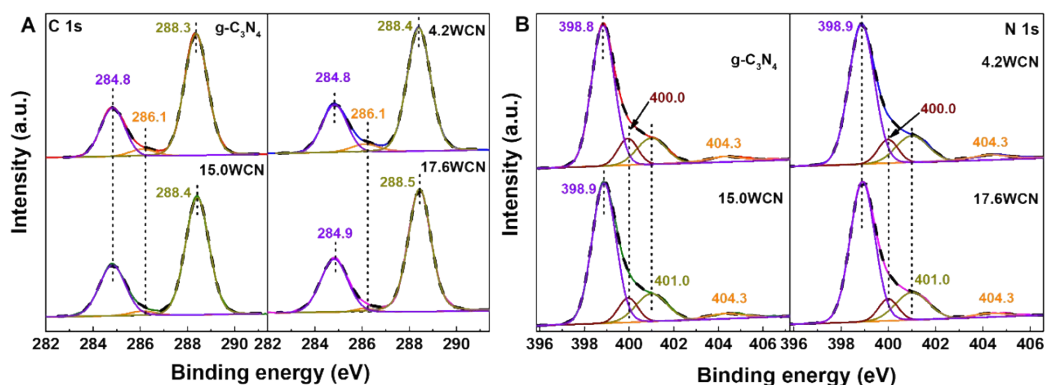

**Fig. S2.** XPS spectra of (A) C 1s and (B) N 1s.

The C 1s XPS spectra of  $g\text{-C}_3\text{N}_4$  in Fig. S2A could be divided into three peaks at 284.8 eV, 286.1 eV and 288.3 eV, ascribing to the carbon impurities species (C-C), the C-N and  $sp^2$ -hybridized carbon bonded to the neighboring three nitrogen atoms (N-C=N) in  $g\text{-C}_3\text{N}_4$  lattice, respectively.<sup>[1]</sup> Compared with  $g\text{-C}_3\text{N}_4$ , the peaks locating at about 284.8 eV and 288.3 eV in the  $n\text{WCN}$  samples have a certain shift toward high binding energy. Fig. S2B displays the N 1s spectra of  $g\text{-C}_3\text{N}_4$  and  $n\text{WCN}$ . It can be segregated into four peaks at 398.8 eV, 400.0 eV, 401.0 eV and 404.3 eV, corresponding to  $sp^2$ -hybridized N species (C=N-C),  $sp^3$ -hybridized tertiary N-(C)<sub>3</sub> groups, amino functional groups (C-N-H) and the  $\pi$ -excitation of C-N heterocycles, respectively.<sup>[2, 3]</sup> The peak at 398.8 eV of  $n\text{WCN}$  has a slight positive shift compared with pure  $g\text{-C}_3\text{N}_4$ . Combined with the C 1s XPS spectra, the shift to high binding energy indicates the existence of charge transfer between  $g\text{-C}_3\text{N}_4$  and  $\text{WO}_3$ .<sup>[4]</sup>

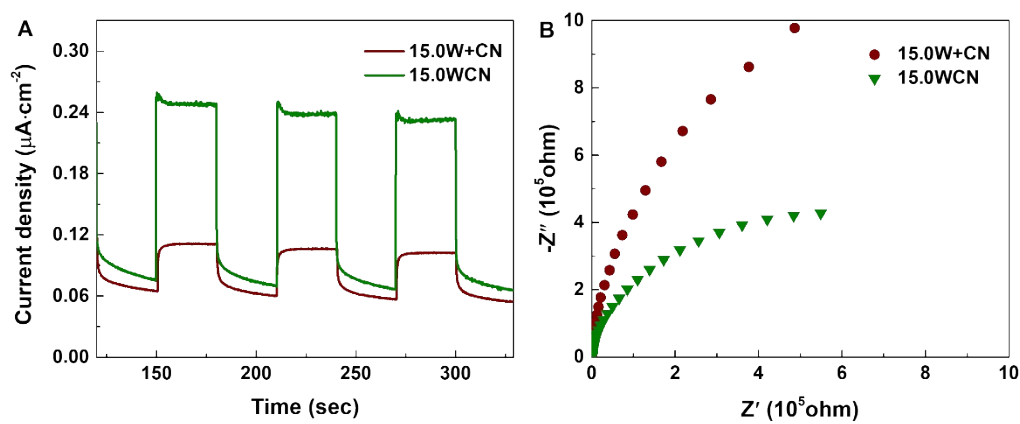

**Fig. S3.** (A) Transient photocurrent responses and (B) EIS Nyquist plots of 15.0W+CN and 15.0WCN.

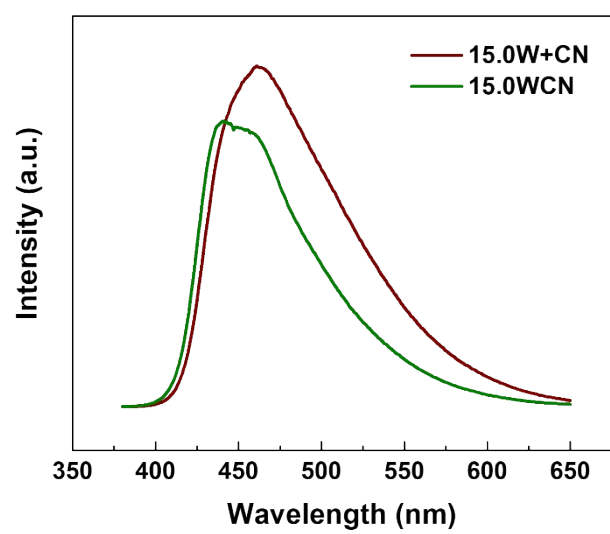

**Fig. S4.** Photoluminescence emission spectra of 15.0W+CN and 15.0WCN.

**Table S1.** The BET surface area and pore structure of the samples.

| Samples                   | $S_{\text{BET}}$ ( $\text{m}^2 \text{g}^{-1}$ ) | Pore volume ( $\text{cm}^3 \text{g}^{-1}$ ) | Pore diameter (nm) |
|---------------------------|-------------------------------------------------|---------------------------------------------|--------------------|
| $\text{WO}_3$             | 4.2                                             | 0.01                                        | 2.1                |
| g- $\text{C}_3\text{N}_4$ | 14.8                                            | 0.03                                        | 4.8                |
| 4.2WCN                    | 16.7                                            | 0.04                                        | 4.7                |
| 15.0WCN                   | 18.8                                            | 0.03                                        | 4.7                |
| 17.6WCN                   | 19.1                                            | 0.04                                        | 4.7                |

**Table S2.** The H<sub>2</sub> production rates and apparent quantum efficiencies of the samples.

| Samples                         | H <sub>2</sub> production rate (μmol h <sup>-1</sup> ) | AQE (%) |
|---------------------------------|--------------------------------------------------------|---------|
| g-C <sub>3</sub> N <sub>4</sub> | 5.8                                                    | 1.7%    |
| 4.2WCN                          | 11.2                                                   | 3.3%    |
| 15.0WCN                         | 24.5                                                   | 7.4%    |
| 17.6WCN                         | 12.4                                                   | 3.7%    |

**Table S3.** Binding energy, peak area and relative percentage of different W species in W 4f spectra.

| samples         | Binding energy of W (eV) |                   |                   |                   | peak area (Counts) |                 | Percentage (%)  |                 |
|-----------------|--------------------------|-------------------|-------------------|-------------------|--------------------|-----------------|-----------------|-----------------|
|                 | W <sup>6+</sup>          |                   | W <sup>5+</sup>   |                   | W <sup>6+</sup>    | W <sup>5+</sup> | W <sup>6+</sup> | W <sup>5+</sup> |
|                 | 4f <sub>5/2</sub>        | 4f <sub>7/2</sub> | 4f <sub>5/2</sub> | 4f <sub>7/2</sub> |                    |                 |                 |                 |
| WO <sub>3</sub> | 38.0                     | 35.9              | -                 | -                 | 112734.6           | -               | 100             | 0               |
| 4.2WCN          | 37.3                     | 35.2              | 36.3              | 34.2              | 3135.0             | 153.6           | 95.3            | 4.7             |
| 15.0WCN         | 37.4                     | 35.3              | 36.3              | 34.3              | 13635.3            | 781.8           | 94.6            | 5.4             |
| 17.6WCN         | 37.4                     | 35.3              | 36.4              | 34.3              | 18890.6            | 819.4           | 95.8            | 4.2             |



**Table S4.** Binding energy, peak area and relative percentage of different O species in O 1s spectra.

| samples         | Binding energy of O 1s (eV) |                 |                  | peak area (Counts) |                 |                  | Percentage (%) |                 |                  |
|-----------------|-----------------------------|-----------------|------------------|--------------------|-----------------|------------------|----------------|-----------------|------------------|
|                 | O <sub>L</sub>              | O <sub>OH</sub> | O <sub>C-O</sub> | O <sub>L</sub>     | O <sub>OH</sub> | O <sub>C-O</sub> | O <sub>L</sub> | O <sub>OH</sub> | O <sub>C-O</sub> |
| WO <sub>3</sub> | 530.7                       | 531.8           | -                | 61148.0            | 14720.9         | -                | 80.6           | 19.4            | -                |
| 4.2WCN          | 529.9                       | 531.8           | 532.5            | 2263.7             | 4432.4          | 7381.9           | 16.1           | 31.5            | 52.4             |
| 15.0WCN         | 529.9                       | 531.8           | 532.5            | 8087.6             | 6732.2          | 3749.4           | 43.5           | 36.3            | 20.2             |
| 17.6WCN         | 530.0                       | 531.8           | 532.5            | 11673.1            | 6000.6          | 3506.7           | 55.1           | 28.3            | 16.6             |

$$\text{Equation S1: } \alpha h\nu = A(h\nu - E_g)^{\frac{2}{n}}$$

where  $\alpha$ ,  $h\nu$ ,  $A$  and  $E_g$  are the optical absorption coefficient, the photon energy, the absorption constant and the band gap energy, respectively. The value of  $n$  is determined by the transition properties of semiconductor. The  $n$  equals to 1 for the direct transition, while the  $n$  equals to 4 for the indirect transition.<sup>[5]</sup> Hence, the values of  $n$  are 1 and 4 for  $\text{WO}_3$  and  $g\text{-C}_3\text{N}_4$ , respectively.

$$\text{Equation S2: } I_t = A \exp\left(\frac{-t}{\tau}\right) + y_0$$

$$\text{Equation S3: } I_t = A_1 \exp\left(\frac{-t}{\tau_1}\right) + A_2 \exp\left(\frac{-t}{\tau_2}\right)$$

Where the  $A_1$  and  $A_2$  are constants representing the weight factor. The  $\tau_1$  and  $\tau_2$  are fast decay time and slow decay time, which stem from the nonradiative recombination of photo-generated electrons at CB into the trap sites of defects and radiative recombination of the photogenerated electrons with the holes at VB, respectively.<sup>[6]</sup> The PL lifetime of  $\text{WO}_3$  was obtained using single exponential fitting equation (Equation S2), while the PL lifetimes of  $g\text{-C}_3\text{N}_4$  and  $n\text{WCN}$  were calculated using double exponential fitting equation (Equation S3). We also calculated the average fluorescence lifetime  $\tau$  using the Equation S4.

$$\text{Equation S4: } \tau = A_1 \tau_1^2 + A_2 \tau_2^2 / A_1 \tau_1 + A_2 \tau_2$$

## References

- [1] C. Liu, H. Huang, W. Cui, F. Dong and Y. Zhang, *Appl. Catal. B: Environ.*, 2018, **230**, 115-124.
- [2] L. Shi, L. Liang, F. Wang, M. Liu, K. Chen, K. Sun, N. Zhang and J. Sun, *ACS Sustain. Chem. Eng.*, 2015, **3**, 3412-3419.
- [3] J. Fu, C. Bie, B. Cheng, C. Jiang and J. Yu, *ACS Sustain. Chem. Eng.*, 2018, **6**, 2767-2779.
- [4] J. Fu, Q. Xu, J. Low, C. Jiang and J. Yu, *Appl. Catal. B: Environ.*, 2019, **243**, 556-565.
- [5] T. Xiao, Z. Tang, Y. Yang, L. Tang, Y. Zhou and Z. Zou, *Appl. Catal. B: Environ.*, 2018, **220**, 417-428.
- [6] M. Wu, T. Ding, J. Cai, Y. Wang, H. Xiang, H. Zhang, Y. Tian, T. Zhang and X. Li, *ACS Sustain. Chem. Eng.*, 2018, **6**, 8167-8177.
